# Supplementary material for: Bridging muscle and bone: shared genetic signatures of osteosarcopenia revealed by reverse Gene Ontology lookup
Source: Research Square preprint supplement (doi:10.21203/rs.3.rs-8000419/v1), 2025-11-04
Supplement: Supplementary file 2 [file b5452eef605ea41a4a34b627.docx]

**Supplementary Information** **3: KEGG over-representation analysis of 37 osteosarcopenia-associated genes using ShinyGO version 0.82**

| Pathway | FE | FDR | nGenes | Pathway genes | Overlap genes |
| --- | --- | --- | --- | --- | --- |
| Malaria | 61.4 | 2.8×10⁻⁷ | 5 | 49 | IL1B, IL18, MYD88, CD36, CD40LG |
| NF-kappa B signalling pathway | 57.9 | 4.9×10⁻¹⁴ | 10 | 104 | MALT1, IL1B, MYD88, PLCG2, PRKCQ, BTK, TRAF2, TNFSF11, RIPK1, TNFRSF11A |
| Cytosolic DNA-sensing pathway | 47.8 | 7.6×10⁻⁷ | 5 | 63 | PYCARD, IL1B, IL18, RIPK1, AIM2 |
| Legionellosis | 42.3 | 2.2×10⁻⁵ | 4 | 57 | PYCARD, IL1B, IL18, MYD88 |
| NOD-like receptor signaling pathway | 39.5 | 7.7×10⁻¹⁵ | 12 | 183 | NOD1, RBCK1, PYCARD, IL1B, IL18, MYD88, NOD2, CARD9, TRAF2, RIPK1, RIPK2, AIM2 |
| Inflammatory bowel disease | 37.1 | 3.1×10⁻⁵ | 4 | 65 | IL1B, IL18, NOD2, STAT3 |
| Prolactin signaling pathway | 34.4 | 3.9×10⁻⁵ | 4 | 70 | FOXO3, STAT3, TNFSF11, TNFRSF11A |
| Shigellosis | 34.3 | 2.1×10⁻¹⁶ | 14 | 246 | NOD1, RBCK1, MALT1, FOXO3, PYCARD, IL1B, IL18, MYD88, PLCG2, PRKCQ, TP53, TRAF2, RIPK1, RIPK2 |
| C-type lectin receptor signaling pathway | 28.9 | 8.7×10⁻⁶ | 5 | 104 | MALT1, PYCARD, IL1B, PLCG2, CARD9 |
| Osteoclast differentiation | 28.7 | 7.6×10⁻⁷ | 6 | 126 | IL1B, PLCG2, BTK, TRAF2, TNFSF11, TNFRSF11A |
| Tuberculosis | 26.9 | 9.9×10⁻⁹ | 8 | 179 | MALT1, IL1B, IL18, MYD88, NOD2, CARD9, RIPK2, SPHK1 |
| TNF signalling pathway | 26.9 | 1.2×10⁻⁵ | 5 | 112 | IL1B, NOD2, TRAF2, RIPK1, IL18R1 |
| Epstein–Barr virus infection | 26.8 | 1.3×10⁻⁹ | 9 | 202 | BCL2L11, MYD88, PLCG2, EIF2AK2, STAT3, BTK, TP53, TRAF2, RIPK1 |
| Necroptosis | 26.5 | 1.3×10⁻⁷ | 7 | 159 | RBCK1, PYCARD, IL1B, EIF2AK2, STAT3, TRAF2, RIPK1 |
| Lipid and atherosclerosis | 25.3 | 1.7×10⁻⁹ | 9 | 214 | PYCARD, IL1B, IL18, MYD88, STAT3, TP53, TRAF2, CD36, CD40LG |

Table note:FE – fold enrichment; FDR – false discovery rate; nGenes - number of input genes overlapping the pathway; Pathway Genes - total genes annotated to that KEGG pathway; Overlap genes - overlapping input genes. Only terms meeting the pre-specified thresholds (FDR < 5×10⁻⁵ and fold-enrichment, FE > 25) are shown, ranked by FE. Benjamini–Hochberg–adjusted p-value across all KEGG pathways tested (background = KEGG *Homo sapiens* gene universe as implemented by ShinyGO).
