# Supplementary material for: Bridging muscle and bone: shared genetic signatures of osteosarcopenia revealed by reverse Gene Ontology lookup
Source: Research Square preprint supplement (doi:10.21203/rs.3.rs-8000419/v1), 2025-11-04
Supplement: Supplementary file 3 [file e6a0bc12e2e8c2b34721328c.docx]

**Supplementary Information** **2**: **Full statistical output of GOReverseLookup and analysis of genes**.

| Gene | p-value (O) | p-value (S) | Literature (O) | Literature (S) | GDA (O) | GDA (S) | Expression in bone | Expression in muscle |
| --- | --- | --- | --- | --- | --- | --- | --- | --- |
| NOD1 | 7.31e-19 | 1.00e-21 | (1) | / | 0.1 | 0 | medium | medium |
| PLCG2 | 6.73e-17 | 2.37e-17 | / | / | 0 | 0 | below cutoff | low |
| RBCK1 | 3.88e-21 | 1.04e-16 | / | / | 0 | 0 | medium | medium |
| RIPK1 | 5.73e-37 | 9.26e-16 | (2) | / | 0 | 0 | low | medium |
| CARD9 | 2.21e-21 | 1.46e-15 | / | / | 0 | 0 | low | low |
| RTKN2 | 1.65e-15 | 5.48e-15 | / | / | 0 | 0 | below cutoff | low |
| PYCARD | 5.49e-26 | 4.71e-14 | / | / | 0 | 0 | low | low |
| IL18R1 | 2.13e-14 | 6.57e-14 | / | / | 0 | 0 | low | low |
| RIPK2 | 1.53e-13 | 2.15e-14 | (1) | / | 0 | 0 | medium | medium |
| TNFRSF11A | 3.26e-31 | 2.16e-13 | (3) | / | 0.85 | 0 | low | medium |
| MYD88 | 1.20e-16 | 5.07e-13 | (4) | / | 0 | 0.15 | low | medium |
| AGER | 2.60e-22 | 5.73e-13 | (5) | (6) | 0.3 | 0.3 | low | medium |
| TNFSF11 | 1.34e-35 | 8.05e-13 | (7) | (7) | 1 | 0.1 | no data | low |
| TERF2IP | 1.32e-11 | 3.31e-14 | / | / | 0.1 | 0.1 | medium | medium |
| CLU | 4.61e-12 | 1.94e-11 | (8) | (9) | 0.2 | 0 | medium | medium |
| CD36 | 6.86e-16 | 2.89e-11 | (10) | / | 0.1 | 0 | low | medium |
| STAT3 | 1.66e-31 | 7.56e-11 | (11) | (11) | 0.3 | 0.1 | medium | medium |
| NOD2 | 6.53e-22 | 3.15e-10 | / | / | 0.2 | 0 | low | low |
| SOSTDC1 | 3.33e-10 | 1.08e-11 | / | / | 0 | 0 | below cutoff | medium |
| EIF2AK2 | 1.09e-16 | 4.11e-10 | (12) | / | 0.2 | 0 | low | medium |
| IL1B | 4.23e-10 | 4.94e-16 | (13) | (14) | 0.5 | 0.25 | low | below cutoff |
| CD40LG | 1.35e-10 | 3.86e-10 | (15) | / | 0.2 | 0 | below cutoff | low |
| LGALS9 | 1.60e-23 | 1.70e-09 | / | / | 0 | 0 | medium | medium |
| MALT1 | 5.09e-10 | 1.41e-09 | / | / | 0.2 | 0 | low | medium |
| AIM2 | 7.93e-10 | 2.23e-09 | / | / | 0 | 0 | below cutoff | below cutoff |
| SPHK1 | 3.41e-09 | 6.39e-14 | (16) | (17) | 0 | 0 | low | low |
| BTK | 9.48e-10 | 2.67e-09 | / | / | 0 | 0 | low | low |
| ZBTB7A | 1.04e-15 | 3.71e-09 | / | / | 0 | 0 | medium | medium |
| TRAF2 | 1.04e-09 | 2.90e-09 | (18) | / | 0 | 0 | low | medium |
| IL18 | 4.75e-09 | 1.03e-13 | (19) | (20) | 0.2 | 0.7 | medium | low |
| ANKRD42 | 1.92e-09 | 3.50e-09 | / | / | 0 | 0 | low | low |
| TP53 | 9.27e-17 | 9.32e-09 | (21) | (22) | 0.3 | 0.2 | low | medium |
| FOXO3 | 2.71e-09 | 7.62e-09 | (23) | (24) | 0.25 | 0.2 | medium | medium |
| BCL2L11 | 3.36e-09 | 8.49e-09 | / | / | 0 | 0 | low | medium |
| RPS3 | 3.33e-14 | 2.08e-08 | / | / | 0 | 0 | medium | medium |
| RIPK4 | 1.62e-08 | 3.00e-08 | / | / | 0 | 0 | below cutoff | below cutoff |
| PRKCQ | 1.40e-08 | 3.97e-08 | / | / | 0 | 0 | low | medium |

Table note: O - osteoporosis; S - sarcopenia; GDA - gene–disease association score (DisGeNET v25.1.1). Values are two-tailed enrichment p-values with FDR control (Benjamini–Hochberg); genes are shown if significant in both condition at p < 5 × 10⁻⁸. Literature collum provides numbered citations supporting an osteoporosis/sarcopenia link. GDA collum provides DisGeNET gene–disease association scores. Expression levels in bone and muscle (Expression Atlas, EMBL-EBI) are categorized by TPM: high (>1000), medium (>11), low (>0.5), below cutoff (≤0.5).

1. Wei, J. et al. Gut–bone axis perturbation: mechanisms and interventions via gut microbiota as a primary driver of osteoporosis. *J Orthop Transl* **50**, 373–387 (2025).
2. Hu, X. et al. Necroptosis: a new target for prevention of osteoporosis. *Front Endocrinol* **13**, 1032614 (2022).
3. McClung, M. Role of RANKL inhibition in osteoporosis. *Arthritis Res Ther* **9**(Suppl 1), S3 (2007).
4. Alshaweesh, J. et al. MyD88 in osteoclast and osteoblast lineages differentially controls bone remodeling in homeostasis and malaria. *Int Immunol* **36**, 451–464 (2024).
5. Zhou, J. et al. The RAGE signaling in osteoporosis. *Biomed Pharmacother* **165**, 115044 (2023).
6. Granic, A. et al. Advanced glycation end products in skeletal muscle health and sarcopenia: a systematic review of observational studies. *Mech Ageing Dev* **209**, 111744 (2023).
7. Bidirectional crosstalk between bone and muscle: the role of RANKL pathway in osteosarcopenia. *J Endocrinol* **262**, (2024).
8. Visconti, V. V. et al. Deregulated clusterin as a marker of bone fragility: new insights into the pathophysiology of osteoporosis. *Genes* **13**, 652 (2022).
9. Pucci, S. et al. Clusterin silencing restores myoblast viability and down-modulates the inflammatory process in osteoporotic disease. *J Transl Med* **17**, 118 (2019).
10. Association of mesenchymal stem cell communication with key genes *COL1A1* and *CD36* in osteoporosis. *Sciety* (2025).
11. Liu, D., Wang, K., Wang, J., Cao, F. & Tao, L. Identification of the molecular link: STAT3 is a shared key gene linking postmenopausal osteoporosis and sarcopenia. *Bone Joint Res* **13**, 411–426 (2024).
12. Deng, Y., Wang, Y., Shi, Q. & Jiang, Y. Identification of hub genes associated with osteoporosis development by comprehensive bioinformatics analysis. *Front Genet* **14**, 1028681 (2023).
13. Polzer, K. et al. Interleukin-1 is essential for systemic inflammatory bone loss. *Ann Rheum Dis* **69**, 284–290 (2010).
14. He, Y. et al. Exploring the impact of interleukins on sarcopenia development: a systematic review and meta-analysis. *Exp Gerontol* **193**, 112480 (2024).
15. Pineda, B. et al. Gene–gene interaction between CD40 and CD40L reduces bone mineral density and increases osteoporosis risk in women. *Osteoporos Int* **22**, 1451–1458 (2011).
16. Xu, X. et al. The role of SphK/S1P/S1PR signaling pathway in bone metabolism. *Biomed Pharmacother* **169**, 115838 (2023).
17. Pierucci, F. et al. Involvement of released sphingosine-1-phosphate/sphingosine-1-phosphate receptor axis in skeletal muscle atrophy. *Biochim Biophys Acta Mol Basis Dis* **1864**, 3598–3614 (2018).
18. TNF receptor-associated factors: promising targets of natural products for the treatment of osteoporosis. *Front Physiol* **16**, 1527814 (2025).
19. Mansoori, M. N. et al. IL-18BP is decreased in osteoporotic women: prevents inflammasome-mediated IL-18 activation and reduces Th17 differentiation. *Sci Rep* **6**, 33680 (2016).
20. Ho, T. L. et al. HMGB1 promotes in vitro and in vivo skeletal muscle atrophy through an IL-18-dependent mechanism. *Cells* **11**, 3936 (2022).
21. Yu, T. et al. p53 plays a central role in the development of osteoporosis. *Aging* **12**, 10473–10487 (2020).
22. Di Renzo, L. et al. Individually tailored screening of susceptibility to sarcopenia using p53 codon 72 polymorphism, phenotypes, and conventional risk factors. *Dis Markers* **2014**, 743634 (2014).
23. Yu, W. et al. FoxO3 regulates mouse bone mesenchymal stem cell fate and bone-fat balance during skeletal aging. *Stem Cells Dev* **33**, 365–375 (2024).
24. Gellhaus, B., Böker, K. O., Schilling, A. F. & Saul, D. Therapeutic consequences of targeting the IGF-1/PI3K/AKT/FOXO3 axis in sarcopenia: a narrative review. *Cells* **12**, 2787 (2023).
